# Supplementary material
Source: PubMed Central journal article supplement (PMC3361591)
Supplement: NIHMS358965-supplement-1.pdf [file NIHMS358965-supplement-1.pdf]

## Supplemental information

### Suppl. Table 1. miRNAs predominately expressed in cerebrospinal fluid

---

|                 |                |
|-----------------|----------------|
| hsa-miR-1       | hsa-miR-489    |
| hsa-miR-10a     | hsa-miR-495    |
| hsa-miR-19a     | hsa-miR-511    |
| hsa-miR-20a     | hsa-miR-518b   |
| hsa-miR-21      | hsa-miR-518e   |
| hsa-miR-27a     | hsa-miR-518f   |
| hsa-miR-27b     | hsa-miR-519d   |
| hsa-miR-29a     | hsa-miR-551b   |
| hsa-miR-29c     | hsa-miR-590-5p |
| hsa-miR-31      | hsa-miR-597    |
| hsa-miR-34a     | hsa-miR-628-5p |
| hsa-miR-34c-5p  | hsa-miR-660-   |
| hsa-miR-99a     | hsa-miR-708    |
| hsa-miR-100     | hsa-miR-872    |
| hsa-miR-101     | hsa-miR-885-5p |
| hsa-miR-124     | hsa-miR-886-3p |
| hsa-miR-125b    |                |
| hsa-miR-133a    |                |
| hsa-miR-133b    |                |
| hsa-miR-135a    |                |
| hsa-miR-138     |                |
| hsa-miR-140-5p  |                |
| hsa-miR-142-5p  |                |
| hsa-miR-143     |                |
| hsa-miR-146a    |                |
| hsa-miR-146b-5p |                |
| hsa-miR-152     |                |
| hsa-miR-199a-3p |                |
| hsa-miR-204     |                |
| hsa-miR-216a    |                |
| hsa-miR-218     |                |
| hsa-miR-299-5p  |                |
| hsa-miR-323-3p  |                |
| hsa-miR-335     |                |
| hsa-miR-338-3p  |                |
| hsa-miR-340     |                |
| hsa-miR-346-    |                |
| hsa-miR-362-3p  |                |
| hsa-miR-365     |                |
| hsa-miR-374a    |                |
| hsa-miR-375     |                |
| hsa-miR-376c    |                |
| hsa-miR-410     |                |
| hsa-miR-449a    |                |
| hsa-miR-449b    |                |
| hsa-miR-483-5p  |                |

---

Based on microarray analysis

**Suppl. Table 2. miRNAs detected exclusively in cerebrospinal fluid**

hsa-miR-9  
 hsa-miR-15a  
 hsa-miR-32  
 hsa-miR-127-5p  
 hsa-miR-129-3p  
 hsa-miR-135b  
 hsa-miR-137  
 hsa-miR-188-3p  
 hsa-miR-203  
 hsa-miR-208  
 hsa-miR-219-2-3p  
 hsa-miR-219-5p  
 hsa-miR-302c  
 hsa-miR-369  
 hsa-miR-376b  
 hsa-miR-411  
 hsa-miR-424  
 hsa-miR-429  
 hsa-miR-448  
 hsa-miR-450a  
 hsa-miR-450b-5p  
 hsa-miR-452  
 hsa-miR-455-5p  
 hsa-miR-488  
 hsa-miR-491-3p  
 hsa-miR-517c  
 hsa-miR-519a  
 hsa-miR-520g  
 hsa-miR-525-3p  
 hsa-miR-545  
 hsa-miR-615-5p  
 hsa-miR-885-3p  
 hsa-miR-98

Based on microarray analysis

**Suppl. Table 3. miRNA expression levels in cerebrospinal fluid and whole blood of three miRNAs analyzed by microarray and qPCR.**

|                             | CSF         | Whole Blood  | Paired <i>t</i> -test | <i>d.f</i> | p-value |
|-----------------------------|-------------|--------------|-----------------------|------------|---------|
| <b>Microarray</b>           |             |              |                       |            |         |
| mir 9 mean $\Delta$ Ct (SD) | 6.93 (2.1)  | ND           |                       |            | N/A     |
| mir 328                     | 5.82 (1.60) | 1.79 (3.83)  | 2.54                  | 5          | 0.05    |
| let 7b                      | 2.5 (0.96)  | -0.14 (1.65) | 3.5                   | 7          | 0.01    |
| <b>qPCR</b>                 |             |              |                       |            |         |
| mir 9                       | 2.94 (1.15) | 8.03 (5.56)  | 2.55                  | 5          | 0.05    |
| mir 328                     | 4.09 (0.66) | 0.3 (2.96)   | -4.06                 | 6          | 0.007   |
| let 7b                      | 6.84 (0.99) | 0.97 (2.94)  | 5.63                  | 7          | <0.001  |

CSF: cerebrospinal fluid; *d.f*: degrees of freedom; ND: Not detected; N/A: not applicable due to non-detectable levels in one of the groups.  $\Delta$ CT: Normalized mean Ct levels.

**Suppl. Table 4. Correlation between  $\Delta$ Ct values of cerebrospinal fluid and whole blood for 35 miRNAs fully expressed in both biofluids.**

| miRNA          | Spearman |
|----------------|----------|
| hsa-let-7b     | 0.0238   |
| hsa-let-7d     | 0.4762   |
| hsa-let-7e     | 0.381    |
| hsa-miR-16     | -0.4048  |
| hsa-miR-17     | 0.0476   |
| hsa-miR-19b    | 0.0238   |
| hsa-miR-20b    | 0.5952   |
| hsa-miR-24     | -0.0476  |
| hsa-miR-25     | 0.6429   |
| hsa-miR-26a    | 0.4286   |
| hsa-miR-30b    | 0.1796   |
| hsa-miR-30c    | 0.1905   |
| hsa-miR-92a    | 0.1667   |
| hsa-miR-93     | 0.1905   |
| hsa-miR-106a   | 0.119    |
| hsa-miR-126    | 0.4286   |
| hsa-miR-140-3p | -0.0476  |
| hsa-miR-145    | -0.2381  |
| hsa-miR-146a   | -0.4524  |
| hsa-miR-150    | -0.381   |
| hsa-miR-186    | 0.5714   |
| hsa-miR-191    | -0.4311  |
| hsa-miR-195    | -0.0238  |
| hsa-miR-197    | 0.2857   |
| hsa-miR-222    | -0.4048  |
| hsa-miR-320    | -0.0476  |
| hsa-miR-324-3p | -0.5     |
| hsa-miR-331-3p | 0.0359   |
| hsa-miR-342-3p | -0.5714  |
| hsa-miR-374a   | -0.381   |
| hsa-miR-425    | -0.0476  |
| hsa-miR-484    | -0.5     |
| hsa-miR-532-3p | 0.3929   |
| hsa-miR-574-3p | 0.7857   |
| hsa-miR-886-5p | 0.667    |
